# Supplementary material for: Pivotal role of the B12-core in the structural evolution of B52–B64 clusters
Source: Royal Society of Chemistry journal article supplement (doi:10.1039/d3nr01310c), 2023-01-01
Supplement: d3nr01310c1.pdf [file d3nr01310c1.pdf]

## Supplementary Information

### **Pivotal role of B<sub>12</sub>-core in the structural evolution of B<sub>52</sub>-B<sub>64</sub> clusters**

Xue Wu,<sup>1,2</sup> Rui Liao,<sup>1</sup> Xiaoqing Liang,<sup>3</sup> Linwei Sai,<sup>4\*</sup> Yong Liu,<sup>1</sup> Guochun Yang,<sup>1</sup> Jijun  
Zhao<sup>2\*</sup>

<sup>1</sup> State Key Laboratory of Metastable Materials Science & Technology and Key Laboratory for Microstructural Material Physics of Hebei Province, School of Science, Yanshan University, Qinhuangdao 066004, China

<sup>2</sup> Key Laboratory of Materials Modification by Laser, Ion and Electron Beams (Dalian University of Technology), Ministry of Education, Dalian 116024, China

<sup>3</sup> School of Materials Science and Engineering, Taizhou University, Taizhou 318000, Zhejiang, China

<sup>4</sup> School of Science, Hohai University, Changzhou 213022, China

**Fig. S1** The low-energy isomers of (a)  $B_{52}$ , (b)  $B_{54}$ , (c)  $B_{56}$ , (d)  $B_{58}$ , (e)  $B_{60}$ , (f)  $B_{62}$ , and (g)  $B_{64}$  clusters obtained from HSE06/6-311+G\* and TPSSh/6-311+G\* (in square brackets) calculations, along with the cluster symmetry and relative energy (in eV). The inner atoms of core-shell structures are highlighted in red, and the out-of-plane atoms of bilayer structures are highlighted in blue.

(a)  $B_{52}$

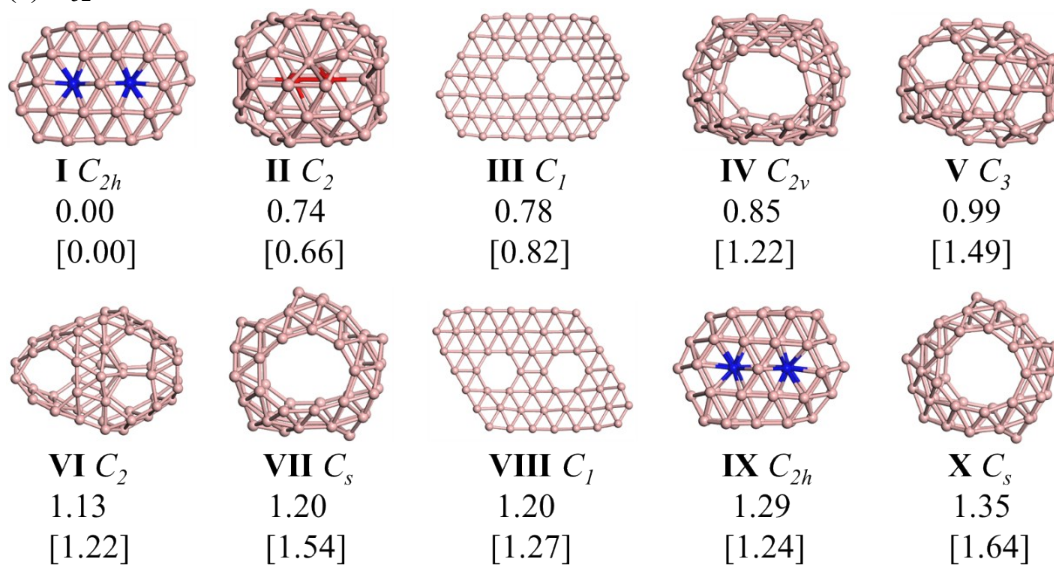

(b)  $B_{54}$

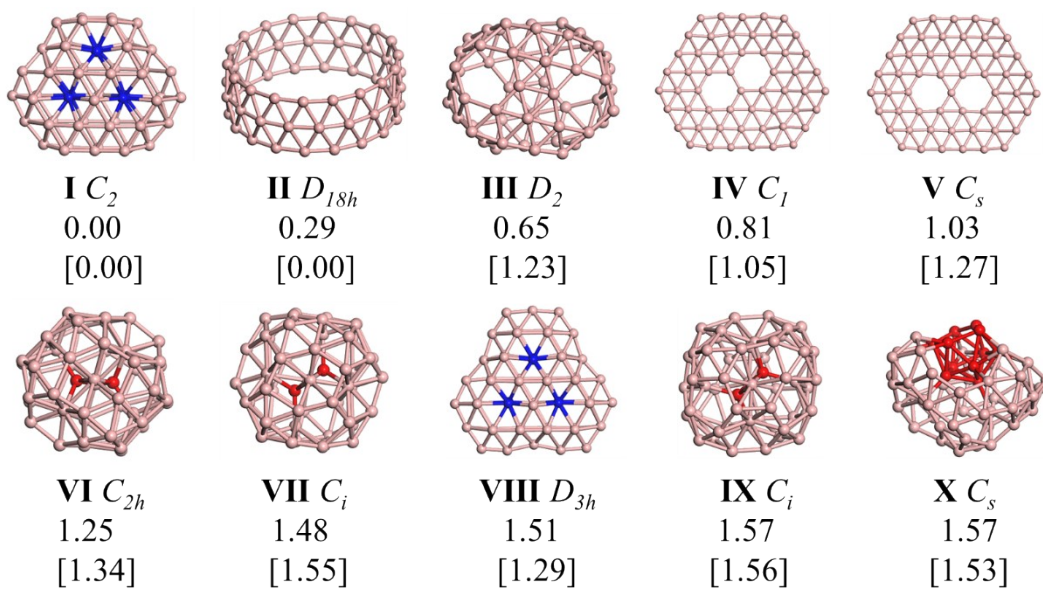

(c) B<sub>56</sub>

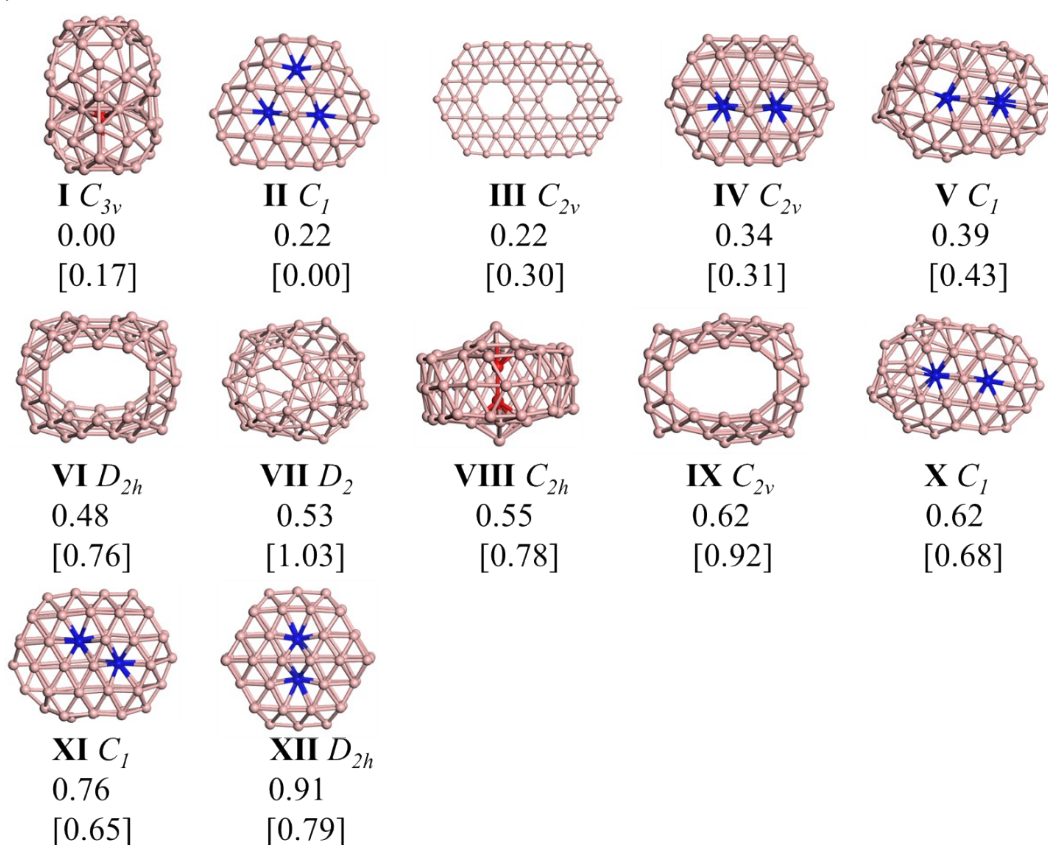

(d) B<sub>58</sub>

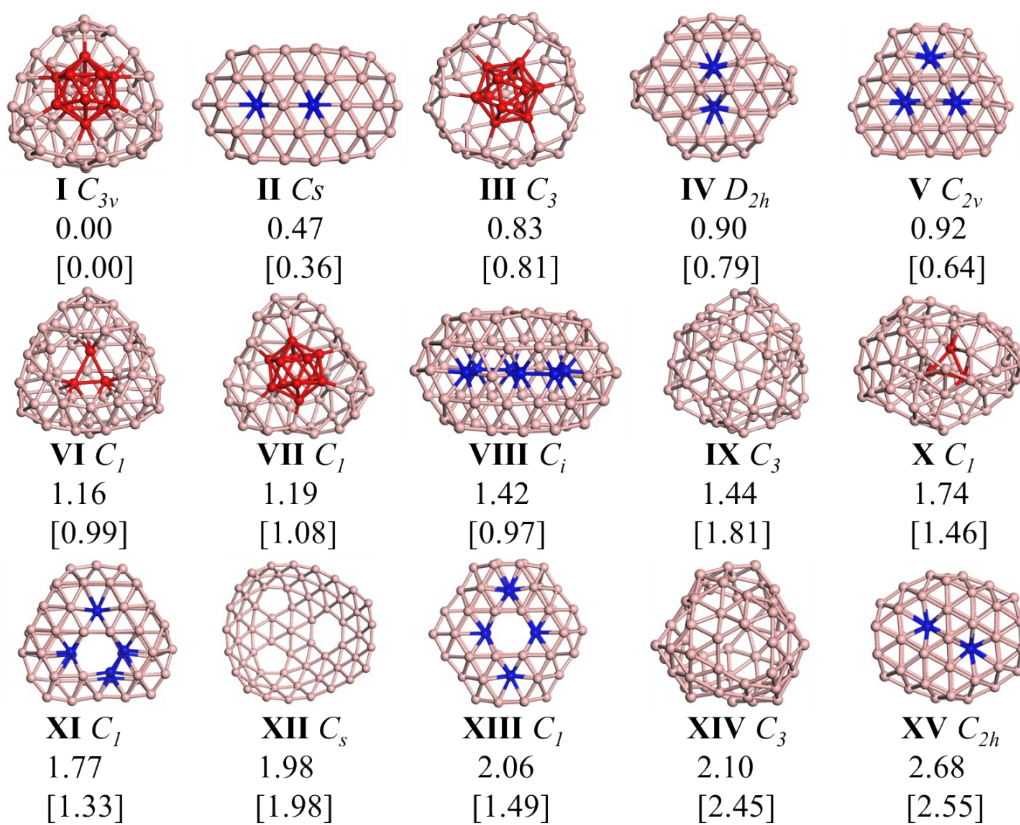

(e) B<sub>60</sub>

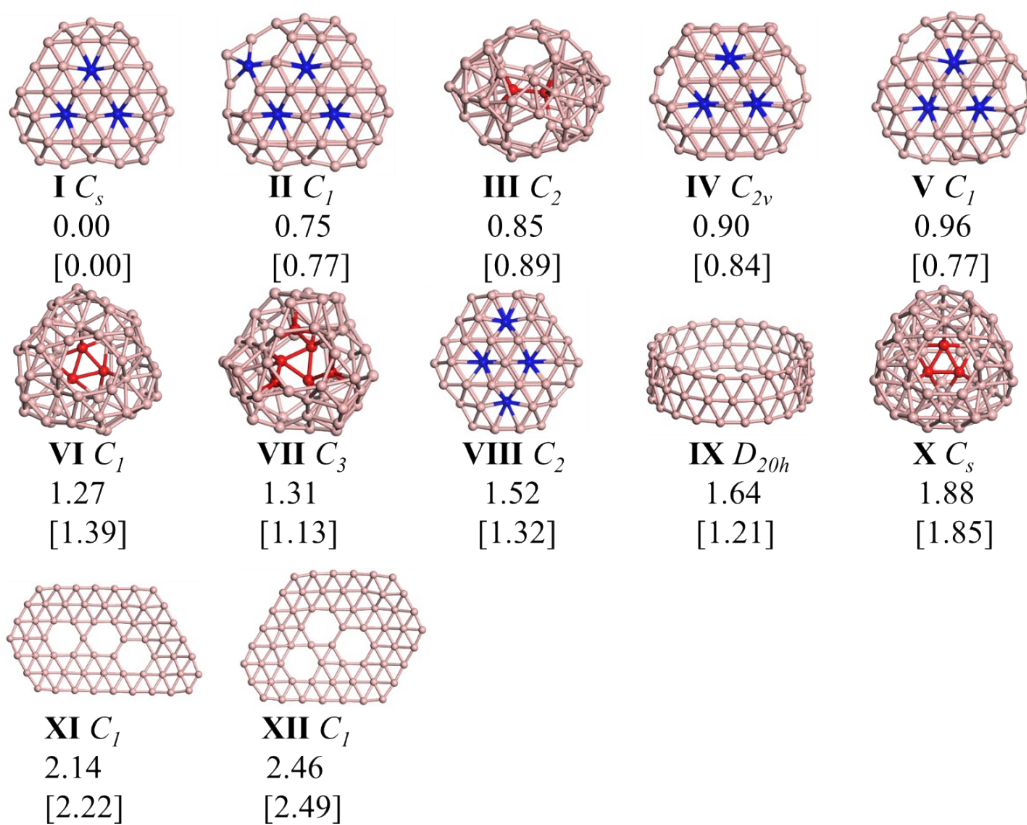

(f) B<sub>62</sub>

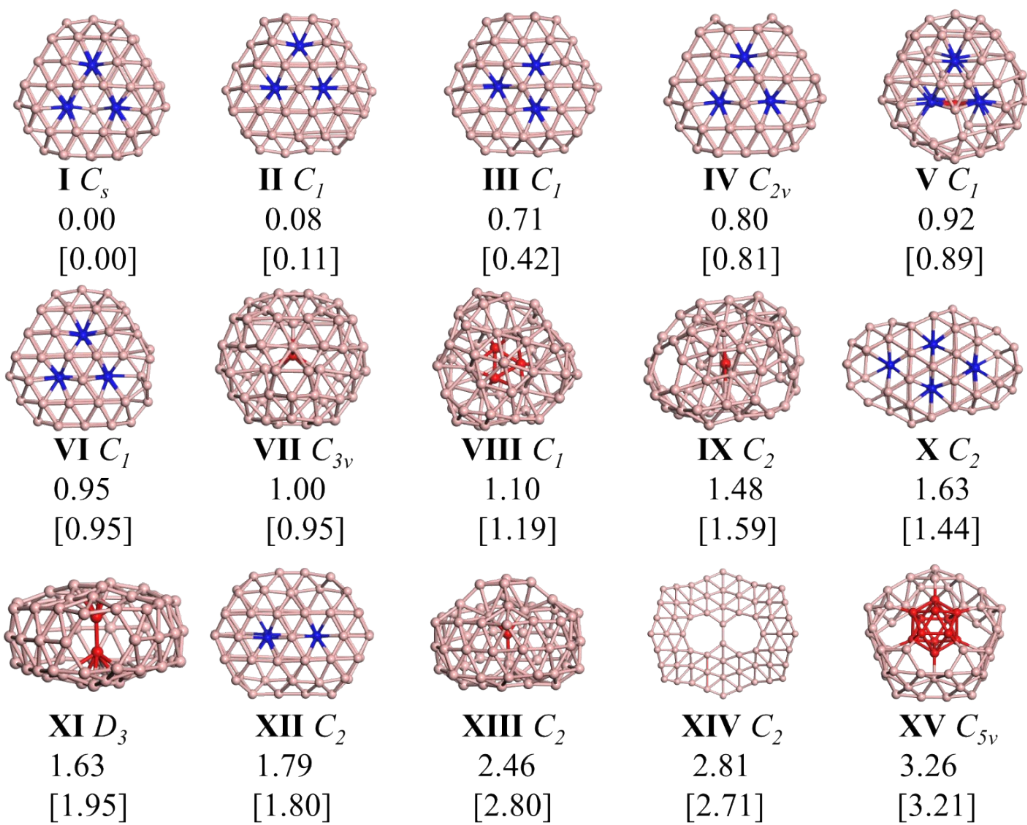

(g) B<sub>64</sub>

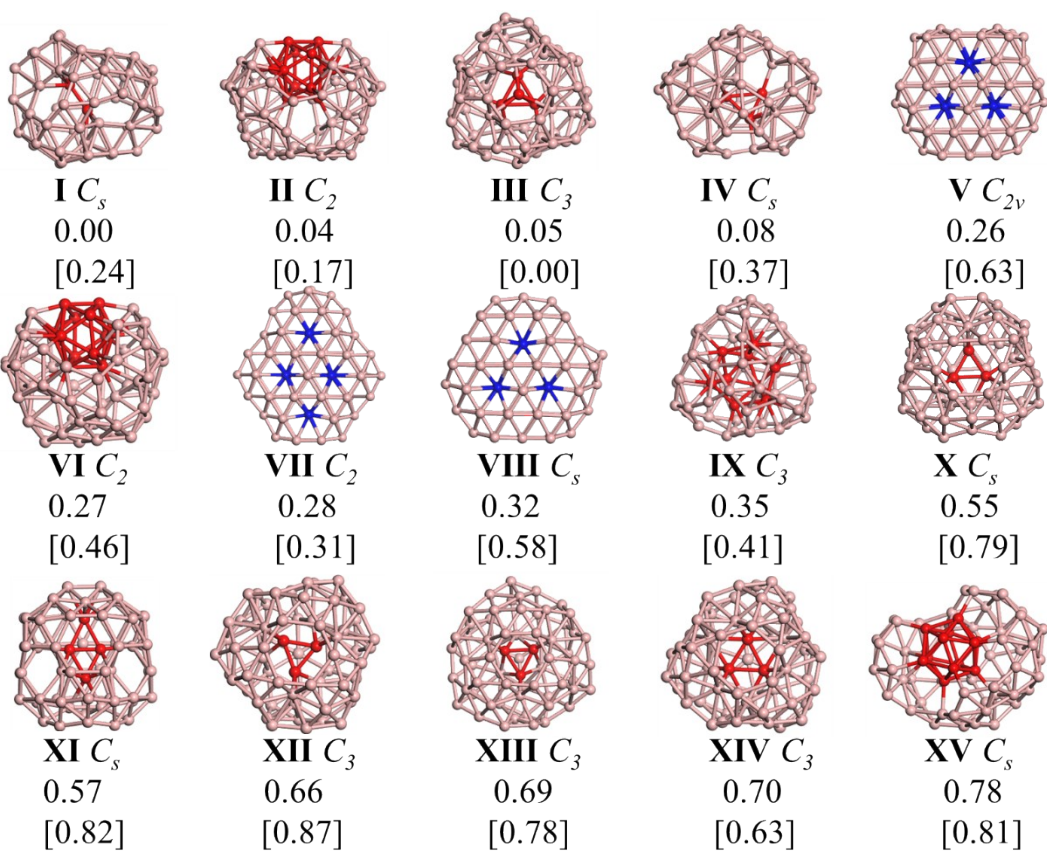

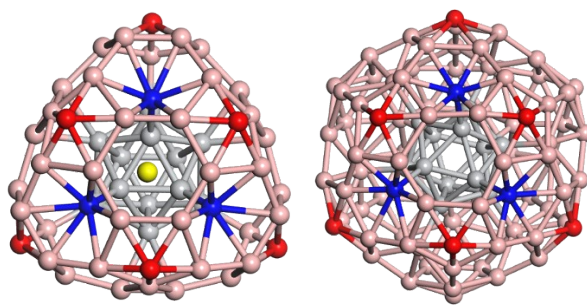

**Fig. S2** Structural comparison between core-shell  $B_{58}$  and  $B_{96}$  clusters. Atoms highlighted in red, blue (yellow), and gray are pentagon capped B, hexagon capped B and core B, respectively.

**Fig. S3** ELF and AdNDP chemical bonding analyses of (a)  $C_s$  B<sub>60</sub>-I bilayer, (b)  $C_s$  B<sub>62</sub>-I bilayer, and (c) core-shell  $C_2$  B<sub>64</sub>-II clusters with a closed electronic shell. ON denotes the occupation number.

(a)  $C_s$  B<sub>60</sub>-I bilayer

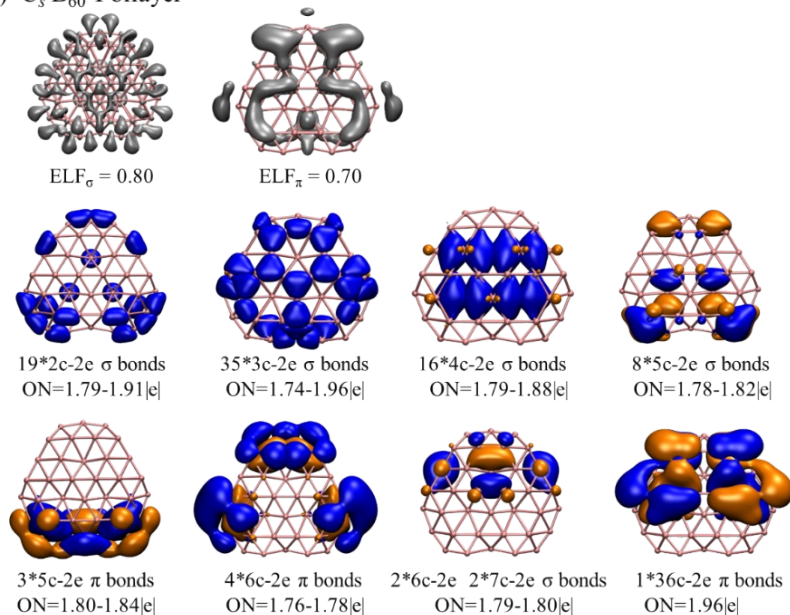

(b)  $C_s$  B<sub>62</sub>-I bilayer

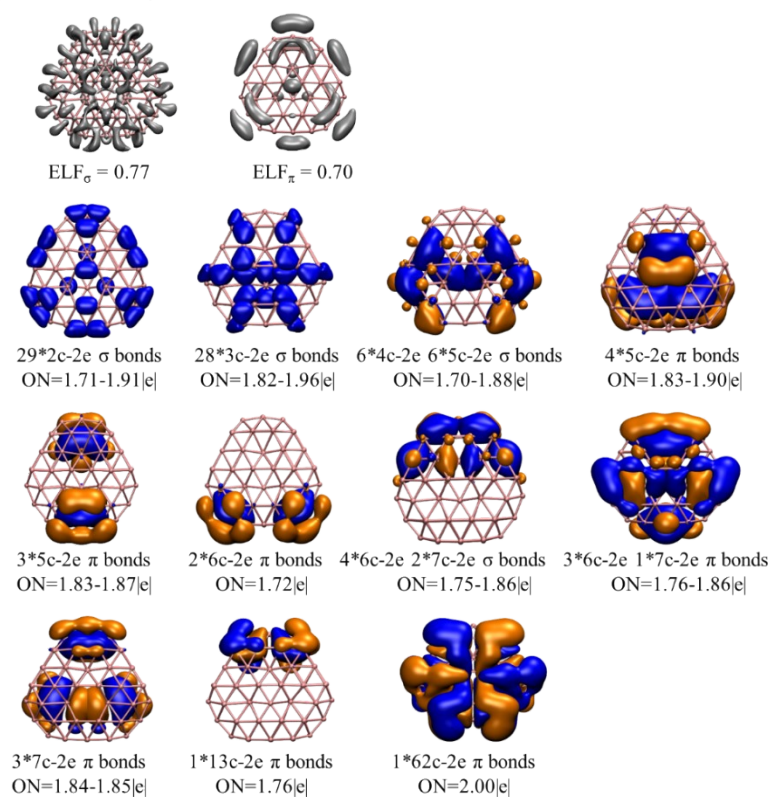

(c)  $C_2$  core-shell  $B_{64}$ -II

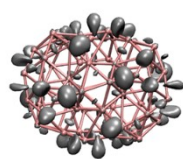

$ELF_{\sigma} = 0.85$

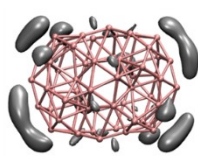

$ELF_{\pi} = 0.70$

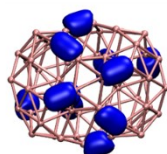

12\*2c-2e  $\sigma$  bonds  
ON=1.88-1.95|e|

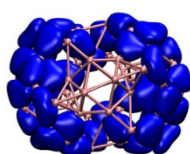

48\*3c-2e  $\sigma$  bonds  
ON=1.73-1.98|e|

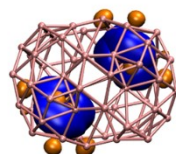

6\*4c-2e  $\sigma$  bonds  
ON=1.56-1.82|e|

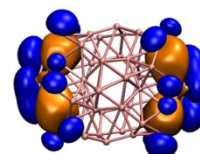

4\*5c-2e  $\sigma$  bonds  
ON=1.78-1.81|e|

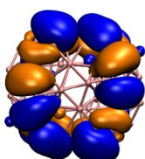

6\*5c-2e  $\sigma$  bonds  
ON=1.71-1.77|e|

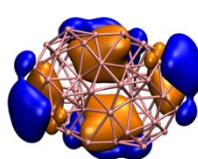

4\*5c-2e  $\pi$  bonds  
ON=1.78-1.81|e|

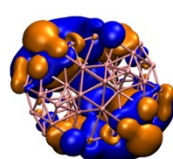

2\*19c-2e  $\pi$  bonds  
ON=1.88|e|

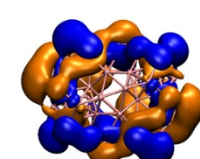

1\*52c-2e  $\pi$  bond  
ON=1.84|e|

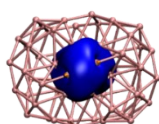

S

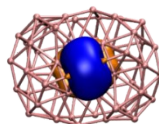

$P_y$

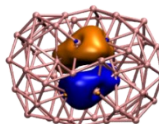

$P_z$

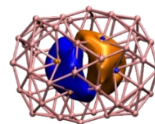

$P_x$

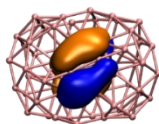

$D_{xz}$

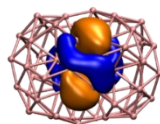

$D_{z^2}$

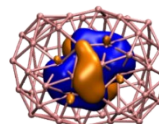

$D_{x^2-y^2}$

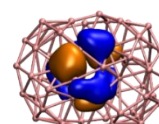

$D_{yz}$

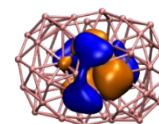

$D_{xy}$

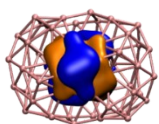

$F_{z(x^2-y^2)}$

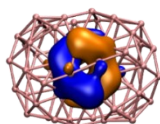

$F_{xyz}$

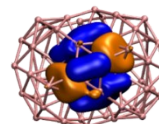

$F_{yz^2}$

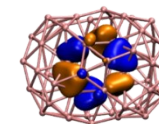

$F_{xz^2}$

13\*12c-2e  $\sigma$  bonds  
ON=1.52-2.00|e|



Table S1. The Cartesian coordinates of global minimum structures of neutral  $B_n$  ( $n = 52-64$ ) clusters.

| B52-I | X         | Y         | Z         |
|-------|-----------|-----------|-----------|
| B     | 3.195754  | 0.794203  | 1.069776  |
| B     | 1.596123  | 0.445824  | 1.607836  |
| B     | 0.330057  | 1.414332  | 0.839399  |
| B     | 1.214753  | -1.178770 | 1.791381  |
| B     | 2.774849  | -0.790484 | 0.927074  |
| B     | -0.734420 | 2.731223  | 1.587371  |
| B     | 2.421536  | -2.372854 | 1.418883  |
| B     | -0.330057 | -1.414332 | 0.839399  |
| B     | -1.596123 | -0.445824 | 1.607836  |
| B     | -2.090536 | -2.052443 | 1.386620  |
| B     | -0.890827 | -3.142841 | 1.331180  |
| B     | -3.195754 | -0.794203 | 1.069776  |
| B     | -2.421536 | 2.372854  | 1.418883  |
| B     | -2.774849 | 0.790484  | 0.927074  |
| B     | 2.090536  | 2.052443  | 1.386620  |
| B     | 0.734420  | -2.731223 | 1.587371  |
| B     | -1.214753 | 1.178770  | 1.791381  |
| B     | 0.000000  | 0.000000  | 1.871659  |
| B     | 3.195754  | 0.794203  | -1.069776 |
| B     | 1.596123  | 0.445824  | -1.607836 |
| B     | 0.330057  | 1.414332  | -0.839399 |
| B     | 1.214753  | -1.178770 | -1.791381 |
| B     | 2.774849  | -0.790484 | -0.927074 |
| B     | -0.734420 | 2.731223  | -1.587371 |
| B     | 2.421536  | -2.372854 | -1.418883 |
| B     | -0.330057 | -1.414332 | -0.839399 |
| B     | -1.596123 | -0.445824 | -1.607836 |
| B     | -2.090536 | -2.052443 | -1.386620 |
| B     | -0.890827 | -3.142841 | -1.331180 |
| B     | -3.195754 | -0.794203 | -1.069776 |
| B     | -2.421536 | 2.372854  | -1.418883 |
| B     | -2.774849 | 0.790484  | -0.927074 |
| B     | 2.090536  | 2.052443  | -1.386620 |
| B     | 0.734420  | -2.731223 | -1.587371 |
| B     | -1.214753 | 1.178770  | -1.791381 |
| B     | 0.000000  | 0.000000  | -1.871659 |
| B     | -0.965412 | -4.419272 | 0.000000  |
| B     | -2.241729 | -3.392501 | 0.000000  |
| B     | -3.248151 | -2.110689 | 0.000000  |
| B     | 0.965412  | 4.419272  | 0.000000  |
| B     | 2.241729  | 3.392501  | 0.000000  |

|       |           |           |           |
|-------|-----------|-----------|-----------|
| B     | 3.248151  | 2.110689  | 0.000000  |
| B     | 0.890827  | 3.142841  | -1.331180 |
| B     | 0.890827  | 3.142841  | 1.331180  |
| B     | 1.912192  | -3.829386 | 0.877655  |
| B     | 1.912192  | -3.829386 | -0.877655 |
| B     | 0.342051  | -4.300081 | 1.086905  |
| B     | 0.342051  | -4.300081 | -1.086905 |
| B     | -1.912192 | 3.829386  | 0.877655  |
| B     | -0.342051 | 4.300081  | 1.086905  |
| B     | -1.912192 | 3.829386  | -0.877655 |
| B     | -0.342051 | 4.300081  | -1.086905 |
| B54-I | X         | Y         | Z         |
| B     | 0.926612  | -0.030275 | -3.309914 |
| B     | -0.926612 | 0.030275  | -3.309914 |
| B     | 0.016671  | 2.881578  | -3.064880 |
| B     | -0.016671 | -2.881578 | -3.064880 |
| B     | 1.115358  | -1.673761 | -3.294317 |
| B     | -1.115358 | 1.673761  | -3.294317 |
| B     | 1.078186  | 1.603641  | -3.306554 |
| B     | -1.078186 | -1.603641 | -3.306554 |
| B     | 0.884067  | -0.732479 | 3.819969  |
| B     | -0.884067 | 0.732479  | 3.819969  |
| B     | -1.019412 | -0.906079 | 3.799385  |
| B     | 1.019412  | 0.906079  | 3.799385  |
| B     | 0.108552  | -2.179516 | 3.611375  |
| B     | -0.108552 | 2.179516  | 3.611375  |
| B     | 1.294056  | -1.633611 | 2.417713  |
| B     | -1.294056 | 1.633611  | 2.417713  |
| B     | 0.039382  | -2.959477 | 2.166911  |
| B     | -0.039382 | 2.959477  | 2.166911  |
| B     | -0.842095 | -0.031128 | 2.116179  |
| B     | 0.842095  | 0.031128  | 2.116179  |
| B     | -1.394948 | -1.736909 | 2.412462  |
| B     | 1.394948  | 1.736909  | 2.412462  |
| B     | -0.858671 | -1.474881 | -0.422089 |
| B     | 0.858671  | 1.474881  | -0.422089 |
| B     | -1.677551 | -0.832436 | -1.918776 |
| B     | 1.677551  | 0.832436  | -1.918776 |
| B     | -1.411310 | -2.478854 | -1.902764 |
| B     | 1.411310  | 2.478854  | -1.902764 |
| B     | 0.075511  | 4.586436  | -0.417806 |
| B     | -0.075511 | -4.586436 | -0.417806 |
| B     | -0.099849 | -3.912614 | -1.812435 |
| B     | 0.099849  | 3.912614  | -1.812435 |

|       |           |           |           |
|-------|-----------|-----------|-----------|
| B     | -1.383170 | 2.514848  | -1.877625 |
| B     | 1.383170  | -2.514848 | -1.877625 |
| B     | 1.671807  | -0.869975 | -1.908110 |
| B     | -1.671807 | 0.869975  | -1.908110 |
| B     | -1.221182 | 3.397024  | -0.507398 |
| B     | 1.221182  | -3.397024 | -0.507398 |
| B     | -0.832380 | 1.467077  | -0.415861 |
| B     | 0.832380  | -1.467077 | -0.415861 |
| B     | -1.894836 | 0.004209  | -0.485306 |
| B     | 1.894836  | -0.004209 | -0.485306 |
| B     | -1.383170 | -3.363900 | -0.509728 |
| B     | 1.383170  | 3.363900  | -0.509728 |
| B     | -1.758306 | -0.880418 | 0.962253  |
| B     | 1.758306  | 0.880418  | 0.962253  |
| B     | -1.780759 | 0.870424  | 0.976275  |
| B     | 1.780759  | -0.870424 | 0.976275  |
| B     | 1.461265  | 2.555491  | 0.949026  |
| B     | -1.461265 | -2.555491 | 0.949026  |
| B     | 1.368448  | -2.509340 | 0.969783  |
| B     | -1.368448 | 2.509340  | 0.969783  |
| B     | -0.428440 | 4.010451  | 0.952232  |
| B     | 0.428440  | -4.010451 | 0.952232  |
| B56-I | X         | Y         | Z         |
| B     | -1.235729 | 1.609303  | 2.174591  |
| B     | -1.235562 | 1.078157  | -2.479083 |
| B     | -1.235742 | -2.688714 | 0.306456  |
| B     | 3.539507  | -0.975319 | -1.368325 |
| B     | 3.538937  | -0.697072 | 1.528612  |
| B     | 3.539794  | 1.671116  | -0.160401 |
| B     | -2.945094 | 1.139228  | -1.976316 |
| B     | -2.944855 | -2.282154 | 0.001109  |
| B     | -2.944437 | 1.141684  | 1.974521  |
| B     | -1.235986 | 2.686021  | -0.333458 |
| B     | -1.234772 | -1.630934 | -2.157617 |
| B     | -1.235206 | -1.053312 | 2.491449  |
| B     | 2.074318  | 1.651799  | 2.168489  |
| B     | 2.074445  | 1.052726  | -2.515442 |
| B     | 2.074674  | -2.704866 | 0.346600  |
| B     | 1.331171  | 0.371200  | 3.117766  |
| B     | 1.331110  | 2.515268  | -1.881315 |
| B     | 1.331799  | -2.886484 | -1.238200 |
| B     | -0.294521 | -2.761233 | -1.183336 |
| B     | -0.294903 | 0.355353  | 2.982345  |
| B     | -0.295192 | 2.406267  | -1.798334 |

|        |           |           |           |
|--------|-----------|-----------|-----------|
| B      | 2.911009  | 0.315018  | 2.648819  |
| B      | 2.910252  | 2.135225  | -1.596015 |
| B      | 2.910655  | -2.449711 | -1.050279 |
| B      | -1.955833 | 0.356798  | 2.995349  |
| B      | -1.956257 | 2.415555  | -1.806397 |
| B      | -1.955614 | -2.772519 | -1.188908 |
| B      | 0.443557  | 1.819658  | -0.222922 |
| B      | 0.446618  | -1.103427 | -1.462896 |
| B      | 0.445316  | -0.715620 | 1.685818  |
| B      | 0.445367  | 1.091893  | 1.471136  |
| B      | 0.446192  | 0.729228  | -1.680889 |
| B      | 0.444099  | -1.820940 | 0.209964  |
| B      | 2.073899  | -1.096589 | 2.495653  |
| B      | 2.074168  | 2.711252  | -0.298331 |
| B      | 2.074676  | -1.613434 | -2.198483 |
| B      | -0.475206 | -2.315121 | 1.731196  |
| B      | -0.475589 | 2.657220  | 1.139320  |
| B      | -0.474314 | -0.341542 | -2.868910 |
| B      | -3.935492 | 0.116628  | 0.982409  |
| B      | -3.937413 | 0.791899  | -0.592791 |
| B      | -3.937269 | -0.910033 | -0.390121 |
| B      | 1.251913  | 2.726122  | 1.168560  |
| B      | 1.252462  | -0.350290 | -2.945584 |
| B      | 1.251986  | -2.375845 | 1.775987  |
| B      | -2.945779 | 2.218586  | -0.534815 |
| B      | -2.944577 | -1.572096 | -1.653966 |
| B      | -2.944159 | -0.646252 | 2.187663  |
| B      | -3.844469 | -1.530050 | 1.143691  |
| B      | -3.845149 | 1.755114  | 0.752434  |
| B      | -3.844890 | -0.226364 | -1.896678 |
| B      | 3.538973  | 1.036233  | 1.322340  |
| B      | 3.539414  | 0.626933  | -1.558566 |
| B      | 3.539923  | -1.661887 | 0.235962  |
| B      | 2.804021  | 0.000219  | 0.000373  |
| B      | 0.963752  | 0.000103  | -0.000231 |
| B56-II | X         | Y         | Z         |
| B      | 0.179417  | -3.647923 | 1.053527  |
| B      | 0.112196  | -2.048699 | 1.656068  |
| B      | 1.311932  | -0.967852 | 0.841365  |
| B      | -1.410087 | -1.339318 | 1.768789  |
| B      | -1.312019 | -2.963319 | 0.961917  |
| B      | 2.889943  | -0.192225 | 1.425231  |
| B      | -2.800980 | -2.336813 | 1.386759  |
| B      | -1.352423 | 0.257778  | 0.847710  |

|   |           |           |           |
|---|-----------|-----------|-----------|
| B | -0.199355 | 1.282416  | 1.718944  |
| B | -1.724538 | 2.049729  | 1.373624  |
| B | -2.999519 | 1.050579  | 1.295094  |
| B | -0.308348 | 2.942173  | 1.324500  |
| B | 2.767891  | 1.490783  | 1.401107  |
| B | 1.103368  | 1.956344  | 0.841966  |
| B | 1.591679  | -2.733765 | 1.381738  |
| B | -2.872525 | -0.608346 | 1.578853  |
| B | 1.388405  | 0.532634  | 1.753214  |
| B | -0.035808 | -0.384084 | 1.902881  |
| B | 0.207903  | -3.639799 | -1.092930 |
| B | 0.129101  | -2.038059 | -1.676449 |
| B | 1.308853  | -0.960587 | -0.834859 |
| B | -1.397443 | -1.331689 | -1.764963 |
| B | -1.289443 | -2.963360 | -0.982532 |
| B | 2.866963  | -0.172574 | -1.358682 |
| B | -2.784366 | -2.337402 | -1.385143 |
| B | -1.346602 | 0.262646  | -0.846691 |
| B | -0.209999 | 1.289815  | -1.704996 |
| B | -1.732774 | 2.066002  | -1.382428 |
| B | -3.003505 | 1.068822  | -1.315119 |
| B | -0.317362 | 2.971205  | -1.356033 |
| B | 2.719112  | 1.516250  | -1.305260 |
| B | 1.081409  | 1.974920  | -0.832981 |
| B | 1.612682  | -2.723358 | -1.398014 |
| B | -2.858362 | -0.601065 | -1.573536 |
| B | 1.399580  | 0.550575  | -1.770773 |
| B | -0.025487 | -0.373037 | -1.910213 |
| B | -4.263591 | 1.362913  | 0.002127  |
| B | -3.046530 | 2.469759  | 0.022348  |
| B | -1.606713 | 3.296409  | 0.008778  |
| B | 4.158401  | -2.385335 | 0.038546  |
| B | 4.177724  | -0.852261 | -0.234987 |
| B | 3.798058  | 0.733573  | -0.000768 |
| B | 2.912666  | -3.318380 | 0.038863  |
| B | 1.434115  | -3.976758 | -0.003639 |
| B | 3.023571  | -1.875963 | -1.235923 |
| B | 3.014186  | -1.865943 | 1.314385  |
| B | -4.157891 | -1.583906 | 0.874286  |
| B | -4.146059 | -1.582203 | -0.877741 |
| B | -4.346792 | 0.043383  | 1.077044  |
| B | -4.333285 | 0.043053  | -1.083537 |
| B | -0.262561 | 4.246548  | 0.039555  |
| B | 1.038638  | 3.874164  | -0.988000 |

|       |           |           |           |
|-------|-----------|-----------|-----------|
| B     | 2.583438  | 3.104271  | 1.032665  |
| B     | 3.706613  | 2.373069  | -0.058568 |
| B     | 2.523988  | 3.172024  | -0.916155 |
| B     | 1.102535  | 3.822184  | 0.929038  |
| B58-I | X         | Y         | Z         |
| B     | 2.738132  | 1.810770  | -0.618517 |
| B     | 0.198205  | -3.276318 | -0.615904 |
| B     | -2.937358 | 1.464166  | -0.617758 |
| B     | -2.196754 | -3.122944 | 1.035009  |
| B     | -1.607198 | 3.465109  | 1.032693  |
| B     | 3.805004  | -0.340320 | 1.033337  |
| B     | -0.205238 | 3.372236  | 1.990908  |
| B     | 3.021022  | -1.506448 | 1.991948  |
| B     | -2.816543 | -1.861035 | 1.992633  |
| B     | 3.065828  | -2.440834 | -0.759123 |
| B     | -3.647676 | -1.433955 | -0.757892 |
| B     | 0.581376  | 3.873964  | -0.760522 |
| B     | 3.794366  | -0.981451 | -0.759077 |
| B     | -2.747017 | -2.793936 | -0.758437 |
| B     | -1.047110 | 3.774550  | -0.760593 |
| B     | 1.543657  | 2.766824  | -1.436425 |
| B     | 1.623748  | -2.721100 | -1.430547 |
| B     | -3.168879 | -0.048337 | -1.435816 |
| B     | -3.378506 | 0.826669  | 0.970258  |
| B     | 2.404149  | 2.512485  | 0.968291  |
| B     | 0.974241  | -3.336504 | 0.969330  |
| B     | 2.561221  | -2.834954 | 1.035531  |
| B     | -3.735762 | -0.799195 | 1.034469  |
| B     | 1.174957  | 3.635005  | 1.032762  |
| B     | 3.253140  | 1.230224  | 0.969301  |
| B     | -0.561232 | -3.430828 | 0.970508  |
| B     | -2.691847 | 2.202412  | 0.969312  |
| B     | -1.283411 | -2.898718 | -1.432916 |
| B     | -1.868445 | 2.559235  | -1.436149 |
| B     | 3.151136  | 0.337288  | -1.434005 |
| B     | 3.825676  | -1.908682 | 0.676019  |
| B     | -3.565866 | -2.358531 | 0.676591  |
| B     | -0.259796 | 4.266874  | 0.672639  |
| B     | 1.426456  | 0.944224  | 1.499324  |
| B     | 0.103446  | -1.705502 | 1.501039  |
| B     | -1.529660 | 0.764650  | 1.498623  |
| B     | -1.706157 | -1.129440 | -0.895187 |
| B     | -0.124794 | 2.041330  | -0.896297 |
| B     | 1.831905  | -0.913702 | -0.895489 |

|       |           |           |           |
|-------|-----------|-----------|-----------|
| B     | -0.061203 | 1.010054  | 0.469622  |
| B     | 0.906263  | -0.451669 | 0.470146  |
| B     | -0.843725 | -0.557685 | 0.469429  |
| B     | -0.105430 | 1.739372  | 2.225059  |
| B     | 1.557485  | -0.775869 | 2.226755  |
| B     | -1.452067 | -0.958508 | 2.226421  |
| B     | 2.382509  | 1.575229  | -2.218258 |
| B     | 0.173618  | -2.853728 | -2.217237 |
| B     | -2.555506 | 1.273915  | -2.217357 |
| B     | -1.679415 | -0.150101 | -2.441504 |
| B     | 0.710789  | 1.524484  | -2.438510 |
| B     | 0.966664  | -1.380680 | -2.438375 |
| B     | 0.055957  | -0.919345 | 3.072242  |
| B     | -0.825880 | 0.414201  | 3.070745  |
| B     | 0.769992  | 0.511135  | 3.071256  |
| B     | 1.684233  | 0.055907  | -2.440781 |
| B     | -0.791158 | -1.487575 | -2.439134 |
| B     | -0.891438 | 1.427305  | -2.440551 |
| B     | -0.000102 | -0.001724 | -2.829840 |
| B60-I | X         | Y         | Z         |
| B     | -4.061942 | 0.287966  | 1.156165  |
| B     | -2.454503 | 3.115900  | -1.212490 |
| B     | -2.502449 | -2.624641 | 1.436145  |
| B     | 0.827416  | 3.210202  | -1.431979 |
| B     | -1.508635 | -1.018901 | -0.827528 |
| B     | -0.000040 | 1.510466  | 0.841359  |
| B     | -0.827399 | 3.210071  | -1.431963 |
| B     | -3.271909 | -1.169013 | 1.455637  |
| B     | -0.000043 | 1.507388  | -0.877731 |
| B     | -1.513880 | -1.036730 | 0.876082  |
| B     | -4.072774 | 0.259648  | -1.103283 |
| B     | -2.455895 | 3.129187  | 1.154222  |
| B     | -3.919883 | -2.427695 | 0.125766  |
| B     | -0.000045 | 4.253723  | -0.026368 |
| B     | -3.252216 | 1.708939  | 0.905952  |
| B     | -3.256090 | 1.699892  | -0.914848 |
| B     | -2.548214 | -2.647889 | -1.255593 |
| B     | 0.821911  | 3.213467  | 1.376169  |
| B     | -4.489710 | -0.900925 | 0.046941  |
| B     | -1.592586 | 4.016766  | -0.028453 |
| B     | -3.284156 | -1.185677 | -1.364699 |
| B     | -0.822002 | 3.213423  | 1.376162  |
| B     | -1.610232 | 1.751428  | 1.604444  |
| B     | -2.505969 | 0.246859  | -1.706130 |

|       |           |           |           |
|-------|-----------|-----------|-----------|
| B     | -2.489901 | 0.276337  | 1.722925  |
| B     | -1.616936 | 1.731869  | -1.631713 |
| B     | -0.850697 | 0.273282  | -1.909584 |
| B     | -0.840989 | 0.280686  | 1.892958  |
| B     | -3.023515 | -3.685719 | 0.093632  |
| B     | 1.592499  | 4.016811  | -0.028425 |
| B     | 3.271773  | -1.168961 | 1.455509  |
| B     | 2.548307  | -2.647819 | -1.255674 |
| B     | 2.489838  | 0.276369  | 1.723008  |
| B     | 0.853330  | -2.604524 | -1.381170 |
| B     | 3.284183  | -1.185575 | -1.364674 |
| B     | 2.502342  | -2.624702 | 1.435925  |
| B     | 3.252164  | 1.708986  | 0.906075  |
| B     | 4.061895  | 0.288009  | 1.156256  |
| B     | 1.508692  | -1.018827 | -0.827496 |
| B     | 1.513812  | -1.036668 | 0.876083  |
| B     | 2.505987  | 0.246960  | -1.706090 |
| B     | 0.845007  | -2.652544 | 1.497207  |
| B     | 0.850722  | 0.273343  | -1.909538 |
| B     | -0.000017 | -1.194911 | 1.688630  |
| B     | 0.000043  | -1.190880 | -1.686469 |
| B     | 0.840900  | 0.280713  | 1.892991  |
| B     | -0.845106 | -2.652510 | 1.497214  |
| B     | 1.616916  | 1.731921  | -1.631530 |
| B     | 1.610144  | 1.751453  | 1.604472  |
| B     | -0.853142 | -2.604595 | -1.381124 |
| B     | 2.455814  | 3.129212  | 1.154217  |
| B     | 3.023866  | -3.685729 | 0.093521  |
| B     | 3.920087  | -2.427611 | 0.125773  |
| B     | 4.489754  | -0.900797 | 0.047014  |
| B     | 0.000013  | -3.588594 | -0.113056 |
| B     | 1.586579  | -3.897205 | -0.489933 |
| B     | -1.586439 | -3.897389 | -0.490465 |
| B     | 3.256060  | 1.699977  | -0.914731 |
| B     | 4.072777  | 0.259772  | -1.103232 |
| B     | 2.454481  | 3.116003  | -1.212485 |
| B62-I | X         | Y         | Z         |
| B     | 3.848154  | -1.507497 | -1.131528 |
| B     | 3.729360  | 1.727748  | 1.205593  |
| B     | 1.078197  | -3.290355 | -1.313081 |
| B     | 0.913145  | 3.365687  | 1.434914  |
| B     | 0.931500  | -1.469561 | 0.966359  |
| B     | 0.799838  | 1.476513  | -0.760108 |
| B     | 2.310218  | 2.509110  | 1.495761  |



|   |           |           |           |
|---|-----------|-----------|-----------|
| B | 2.471714  | -2.424804 | -1.313792 |
| B | 0.843970  | 1.520119  | 0.967714  |
| B | 0.883570  | -1.429848 | -0.761875 |
| B | 3.822705  | -1.513545 | 1.205141  |
| B | 3.756207  | 1.721163  | -1.128148 |
| B | 2.376668  | -3.794087 | -0.051883 |
| B | 2.158258  | 3.922476  | -0.052476 |
| B | 3.855891  | 0.108353  | -1.009765 |
| B | 3.820978  | 0.108299  | 0.855713  |
| B | 1.103798  | -3.307489 | 1.435078  |
| B | 0.889868  | 3.343859  | -1.312481 |
| B | 3.608899  | -2.744790 | 0.036814  |
| B | 3.448197  | 2.944899  | 0.038125  |
| B | 2.450447  | -2.374506 | 1.494877  |
| B | 2.329893  | 2.558566  | -1.311268 |
| B | 2.365520  | 0.936874  | -1.649074 |
| B | 2.383084  | -0.750555 | 1.656940  |
| B | 2.414922  | -0.803002 | -1.649948 |
| B | 2.335943  | 0.884175  | 1.656525  |
| B | 1.001075  | 0.027858  | -1.841627 |
| B | 0.907181  | -4.448707 | 0.053378  |
| B | 0.653732  | 4.491931  | 0.052054  |
| B | -3.359321 | 0.716315  | -1.386333 |
| B | -3.383011 | -0.911373 | 1.398703  |
| B | -1.982971 | 1.593702  | -1.684855 |
| B | -1.866116 | -1.635751 | 1.653979  |
| B | -3.430475 | 0.720903  | 1.398113  |
| B | -3.311562 | -0.905943 | -1.385196 |
| B | -1.981965 | 3.211926  | -0.931649 |
| B | -1.796148 | -3.319820 | -0.928610 |
| B | -3.230184 | -2.567347 | -1.103295 |
| B | -3.371213 | 2.379844  | -1.107204 |
| B | -1.660169 | -0.046278 | 0.872739  |
| B | -1.707715 | -0.048304 | -0.834436 |
| B | -1.956898 | 1.530117  | 1.652873  |
| B | -1.888726 | -1.705185 | -1.683442 |
| B | -0.496346 | 0.787079  | 2.001522  |
| B | -0.452431 | -0.858859 | -1.824147 |
| B | -0.449711 | -0.811608 | 2.001044  |
| B | -0.500358 | 0.830760  | -1.824377 |
| B | -0.355354 | -2.518017 | -1.626702 |
| B | -0.470565 | 2.413153  | 1.671354  |
| B | -0.497161 | 2.492537  | -1.628515 |
| B | -0.331136 | -2.433550 | 1.671894  |

|       |           |           |           |
|-------|-----------|-----------|-----------|
| B     | -0.371796 | -4.097885 | -0.964873 |
| B     | -0.603722 | 4.068735  | -0.965813 |
| B     | -4.180496 | -1.718021 | -0.020846 |
| B     | -4.448457 | -0.125897 | -0.126487 |
| B     | -4.271220 | 1.478924  | -0.022773 |
| B     | -1.771752 | -3.296544 | 0.913516  |
| B     | -3.189999 | -2.524238 | 1.150767  |
| B     | -0.329438 | -4.052583 | 1.169712  |
| B     | -1.957279 | 3.193157  | 0.910678  |
| B     | -3.329239 | 2.342008  | 1.148256  |
| B     | -0.559997 | 4.029158  | 1.166472  |
| B64-1 | X         | Y         | Z         |
| B     | -1.338228 | 0.564335  | 1.415872  |
| B     | -1.338228 | 0.564335  | -1.415872 |
| B     | -3.070455 | -0.166113 | 1.789048  |
| B     | -3.070455 | -0.166113 | -1.789048 |
| B     | 2.427829  | 1.364976  | -1.800628 |
| B     | 2.427829  | 1.364976  | 1.800628  |
| B     | 2.407428  | -0.045005 | 0.827847  |
| B     | 2.407428  | -0.045005 | -0.827847 |
| B     | -0.932241 | 3.863368  | 1.397482  |
| B     | -0.932241 | 3.863368  | -1.397482 |
| B     | 3.502292  | -1.313475 | -1.641007 |
| B     | 3.502292  | -1.313475 | 1.641007  |
| B     | -0.261791 | 0.279040  | 3.374394  |
| B     | -0.261791 | 0.279040  | -3.374394 |
| B     | 2.134212  | 2.777087  | 1.065378  |
| B     | 2.134212  | 2.777087  | -1.065378 |
| B     | -2.217807 | -2.903424 | -1.302023 |
| B     | -2.217807 | -2.903424 | 1.302023  |
| B     | -3.317111 | -1.579065 | -0.772323 |
| B     | -3.317111 | -1.579065 | 0.772323  |
| B     | -3.016646 | 1.236084  | -0.957099 |
| B     | -3.016646 | 1.236084  | 0.957099  |
| B     | -1.571980 | -0.577696 | 2.741773  |
| B     | -1.571980 | -0.577696 | -2.741773 |
| B     | -0.264675 | -1.391899 | 3.510248  |
| B     | -0.264675 | -1.391899 | -3.510248 |
| B     | -2.774907 | -1.714990 | -2.321119 |
| B     | -2.774907 | -1.714990 | 2.321119  |
| B     | 2.659496  | -0.175551 | -2.609197 |
| B     | 2.659496  | -0.175551 | 2.609197  |
| B     | 0.935926  | -2.480710 | 0.836163  |
| B     | 0.935926  | -2.480710 | -0.836163 |

|        |           |           |           |
|--------|-----------|-----------|-----------|
| B      | -0.590390 | -3.146393 | 1.291413  |
| B      | -0.590390 | -3.146393 | -1.291413 |
| B      | -0.491992 | 2.978224  | -2.607561 |
| B      | -0.491992 | 2.978224  | 2.607561  |
| B      | 1.204775  | 2.367299  | -2.430869 |
| B      | 1.204775  | 2.367299  | 2.430869  |
| B      | 0.114109  | 1.863534  | 3.624236  |
| B      | 0.114109  | 1.863534  | -3.624236 |
| B      | 1.179986  | -0.740190 | -3.288695 |
| B      | 1.179986  | -0.740190 | 3.288695  |
| B      | 2.753237  | -2.633132 | -1.015471 |
| B      | 2.753237  | -2.633132 | 1.015471  |
| B      | -1.588315 | 2.285055  | -1.156514 |
| B      | -1.588315 | 2.285055  | 1.156514  |
| B      | 1.675288  | -1.346639 | -1.751176 |
| B      | 1.675288  | -1.346639 | 1.751176  |
| B      | 0.739160  | 3.652244  | 1.478987  |
| B      | 0.739160  | 3.652244  | -1.478987 |
| B      | -1.274649 | -2.351010 | -2.627749 |
| B      | -1.274649 | -2.351010 | 2.627749  |
| B      | 1.463544  | 0.955913  | -3.256923 |
| B      | 1.463544  | 0.955913  | 3.256923  |
| B      | 1.987616  | -3.711328 | 0.000000  |
| B      | -0.551622 | 0.069246  | -0.000000 |
| B      | -2.968549 | 2.612909  | -0.000000 |
| B      | 1.380967  | 3.764673  | -0.000000 |
| B      | -1.510140 | -3.744786 | 0.000000  |
| B      | -1.811776 | 3.770370  | -0.000000 |
| B      | 3.628502  | -1.120661 | 0.000000  |
| B      | -2.313045 | -0.171316 | 0.000000  |
| B      | 0.300385  | -3.911277 | 0.000000  |
| B      | 0.885471  | -0.801561 | 0.000000  |
| B64-II | X         | Y         | Z         |
| B      | 2.590145  | -2.684632 | -1.286999 |
| B      | -2.562313 | 1.654411  | -2.495732 |
| B      | 2.251855  | -1.881156 | -2.729585 |
| B      | -2.240240 | 0.220176  | -3.310407 |
| B      | 0.641934  | 0.559057  | -2.860570 |
| B      | -0.615721 | -1.945989 | -2.182409 |
| B      | 3.051134  | -0.090755 | 2.100927  |
| B      | -3.066448 | 1.159121  | 1.727126  |
| B      | 0.782880  | 3.231803  | 1.769966  |
| B      | -0.805975 | -1.868749 | 3.179718  |
| B      | -4.297995 | -0.266014 | -0.808351 |

|   |           |           |           |
|---|-----------|-----------|-----------|
| B | 4.302086  | -0.184745 | -0.799638 |
| B | 3.260534  | 0.661954  | -1.791629 |
| B | -3.251462 | -1.508352 | -1.221130 |
| B | -3.009614 | 2.618567  | -1.222926 |
| B | 3.009731  | -2.871912 | 0.320981  |
| B | 1.902876  | 1.551611  | -2.481475 |
| B | -1.889591 | -2.601085 | -1.342951 |
| B | -0.822374 | 0.316580  | -0.252738 |
| B | 0.810178  | -0.389480 | -0.056631 |
| B | 0.609120  | 1.015532  | -1.052267 |
| B | -0.612564 | -1.415125 | -0.387172 |
| B | 0.877916  | -1.881627 | -1.232915 |
| B | -0.876731 | 0.988296  | -2.030454 |
| B | 1.170850  | 1.893936  | 2.587423  |
| B | -1.190627 | -0.298725 | 3.182475  |
| B | -0.131638 | 3.174409  | -0.894661 |
| B | 0.145215  | -3.198569 | 0.843240  |
| B | -1.654959 | 1.300273  | 2.710839  |
| B | 1.633613  | 0.275816  | 2.996662  |
| B | -3.825496 | 1.251240  | -1.133337 |
| B | 3.846347  | -1.650062 | -0.321325 |
| B | 1.452533  | -0.848149 | 1.501062  |
| B | -1.460790 | 1.492673  | 0.852272  |
| B | 3.446772  | 1.493289  | 1.192592  |
| B | -3.463629 | -0.683067 | 1.763062  |
| B | 3.949012  | 1.411784  | -0.411919 |
| B | -3.952944 | -1.428835 | 0.375465  |
| B | 1.424462  | -3.207356 | -0.195818 |
| B | -1.412522 | 2.659854  | -1.814700 |
| B | -1.401243 | -2.795328 | 0.383743  |
| B | 1.414393  | 2.606228  | -1.104196 |
| B | -3.343846 | -0.154965 | -2.170235 |
| B | 3.356274  | -0.980772 | -1.915109 |
| B | 0.519641  | -2.349419 | 2.380494  |
| B | -0.548023 | 3.240525  | 0.848917  |
| B | 2.354060  | 2.750597  | 1.714032  |
| B | -2.365088 | -1.489073 | 2.886176  |
| B | 3.149483  | -1.462486 | 1.243810  |
| B | -3.167693 | 1.880356  | 0.312207  |
| B | -0.759818 | -0.452504 | -3.230182 |
| B | 0.790458  | -1.266104 | -3.000687 |
| B | 1.656443  | -0.299207 | -1.692323 |
| B | -1.652000 | -0.617744 | -1.622388 |
| B | 0.436236  | -0.800179 | 3.208233  |

|   |           |           |           |
|---|-----------|-----------|-----------|
| B | -0.459047 | 2.341003  | 2.344520  |
| B | 1.766102  | -2.624891 | 1.421930  |
| B | -1.763544 | 2.986987  | -0.112642 |
| B | -2.786778 | 0.144601  | 2.997115  |
| B | 2.762566  | 1.409607  | 2.658159  |
| B | 2.700249  | 2.482540  | 0.052578  |
| B | -2.688924 | -2.110205 | 1.295065  |
| B | 3.033515  | 2.326034  | -1.541277 |
| B | -3.018973 | -2.791599 | -0.144013 |
